# Supplementary material
Source: Springer Nature journal article supplement (https://www.springermedizin.de/resource/supplementary/12913_2013_3764_MOESM2_ESM.pdf/9533278)
Supplement: MOESM2 [file 9533278]

1) Altered legislation and dissemination of information  
(Paper implementation)

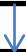

2) Regional Health Authority Procedure  
(Process implementation)

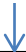

3) Family Assessment & Child  
Talks interventions  
(Performance implementation)

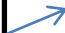

Pre-test (N = 219)

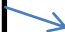

Post-test (N = 185)
